# Supplementary material
Source: PubMed Central journal article supplement (PMC1948900)
Supplement: pnas_0705218104_1.pdf [file pnas_0705218104_1.pdf]

**Table 2.** Epidermal Nevi

| <b>Nr.</b> | <b>Sex</b> | <b>Age</b> | <b>Localization</b> | <b>Subtype</b> | <b>PIK3CA</b> | <b>Control</b> | <b>FGFR3</b> |
|------------|------------|------------|---------------------|----------------|---------------|----------------|--------------|
| 1          | f          | 15         | trunk               | CH             | WT            |                | WT           |
| 2          | m          | 23         | trunk               | CS             | WT            |                | R248C        |
| 3          | f          | 17         | trunk               | CS             | WT            |                | WT           |
| 4          | m          | 25         | NA                  | CH             | WT            |                | WT           |
| 5          | f          | 18         | leg                 | CS             | WT            |                | WT           |
| 6          | m          | 16         | arm                 | CS             | WT            |                | WT           |
| 7          | m          | 23         | trunk               | CH             | WT            |                | WT           |
| 8          | f          | 9          | head                | AV             | WT            |                | WT           |
| 9          | m          | 15         | head                | CH             | WT            |                | WT           |
| 10         | f          | 6          | neck                | AV             | WT            |                | WT           |
| 11         | f          | 13         | head                | CS             | <b>E545G</b>  |                | WT           |
| 12         | f          | 46         | neck                | SK             | WT            |                | WT           |
| 13         | f          | 1          | head                | SK             | WT            |                | R248C        |
| 14         | f          | 6          | head                | CH             | WT            |                | WT           |
| 15         | m          | 20         | arm                 | CS             | <b>E545G</b>  |                | R248C        |
| 16         | m          | 18         | head                | CH             | WT            |                | WT           |
| 17         | m          | 11         | head                | AV             | WT            |                | WT           |
| 18         | m          | 1          | trunk               | C              | <b>E545G</b>  |                | WT           |
| 19         | m          | 5          | arm                 | SK             | <b>E545G</b>  | WT             | WT           |
| 20         | f          | 3          | arm                 | CS             | <b>E545G</b>  | WT             | R248C        |
| 21         | m          | 2          | arm                 | CS             | WT            |                | WT           |
| 22         | f          | 2          | head                | CH             | <b>E545G</b>  | WT             | WT           |
| 23         | m          | 36         | head                | SK             | <b>E545G</b>  | WT             | WT           |
| 24         | m          | 10         | head                | CS             | <b>E545G</b>  |                | WT           |
| 25         | m          | 12         | trunk               | C              | <b>E545G</b>  |                | WT           |
| 26         | f          | 53         | NA                  | CS             | WT            |                | R248C        |
| 27         | f          | 65         | NA                  | AV             | WT            |                | R248C        |
| 28         | m          | 63         | NA                  | AV             | WT            |                | R248C        |
| 29         | m          | 51         | system              | CH             | WT            | WT             | WT           |
| 30         | m          | 34         | trunk               | SK             | WT            |                | WT           |
| 31         | f          | 38         | trunk               | CH             | WT            |                | WT           |
| 32         | f          | 14         | neck                | CS             | WT            |                | WT           |
| 33         | f          | Congenital | head                | C              | WT            |                | WT           |

CS, common soft; CH, common hard; AC, acrokeratosis verruciformis-like; SK, seborrheic keratosis-like
