# Supplementary material
Source: PubMed Central journal article supplement (PMC1948900)
Supplement: pnas_0705218104_2.pdf [file pnas_0705218104_2.pdf]

**Table 3.** Seborrheic keratoses

| Nr | Sex | Age | Localization | Subtype | PIK3CA        | Control | FGFR3       |
|----|-----|-----|--------------|---------|---------------|---------|-------------|
| 1  | m   | 76  | head         | AD      | WT            |         | R248C       |
| 2  | f   | 49  | trunk        | AC      | WT            |         | Y375C       |
| 3  | m   | 50  | trunk        | AC      | <b>E542K</b>  |         | WT          |
| 4  | m   | 25  | trunk        | AC      | WT            |         | WT          |
| 5  | m   | 45  | trunk        | AC      | WT            |         | WT          |
| 6  | m   | 59  | trunk        | AC      | <b>E542K</b>  | WT      | R248C       |
| 7  | m   | 64  | head         | AC      | WT            |         | R248C       |
| 8  | f   | 70  | trunk        | AD      | WT            |         | WT          |
| 9  | f   | 58  | leg          | AC      | WT            |         | WT          |
| 10 | m   | 67  | head         | AC      | WT            |         | R248C       |
| 11 | m   | 39  | trunk        | AC      | WT            |         | WT          |
| 12 | m   | 77  | trunk        | AC      | <b>E545K</b>  |         | WT          |
| 13 | f   | 26  | trunk        | AC      | WT            |         | WT          |
| 14 | m   | 78  | trunk        | AC      | WT            |         | K652M       |
| 15 | m   | 70  | head         | AD      | WT            |         | R248C       |
| 16 | f   | 59  | trunk        | AC      | WT            |         | WT          |
| 17 | m   | 70  | head         | AD      | WT            |         | WT          |
| 18 | f   | 67  | arm          | AC      | <b>E542K</b>  | WT      | WT          |
| 19 | f   | 83  | head         | AC      | WT            |         | R248C       |
| 20 | f   | 60  | head         | AC      | WT            |         | WT          |
| 21 | m   | 56  | neck         | AC      | WT            |         | WT          |
| 22 | f   | 79  | head         | AD      | WT            |         | A393E       |
| 23 | f   | 70  | neck         | AC      | WT            |         | K652M       |
| 24 | m   | 75  | trunk        | AC      | WT            |         | WT          |
| 25 | m   | 68  | trunk        | HY      | <b>E542K</b>  |         | WT          |
| 26 | f   | 49  | trunk        | AD      | WT            |         | S249C/K652M |
| 27 | m   | 41  | head         | AC      | WT            |         | WT          |
| 28 | f   | 56  | trunk        | AC      | WT            |         | WT          |
| 29 | f   | 51  | trunk        | AC      | WT            |         | WT          |
| 30 | f   | 67  | trunk        | AC      | <b>H1047R</b> |         | WT          |
| 31 | m   | 63  | trunk        | AC      | WT            |         | WT          |
| 32 | m   | 39  | trunk        | AC      | WT            |         | WT          |
| 33 | f   | 67  | neck         | AC      | WT            |         | Y375C       |
| 34 | m   | 66  | head         | AC      | WT            |         | S249C       |
| 35 | f   | 86  | head         | AD      | WT            |         | A393E       |
| 36 | f   | 55  | trunk        | AC      | WT            |         | WT          |
| 37 | f   | 55  | trunk        | AC      | WT            |         | WT          |
| 38 | f   | 55  | trunk        | AC      | <b>E545K</b>  |         | WT          |
| 39 | f   | 55  | trunk        | AC      | WT            |         | WT          |
| 40 | f   | 55  | head         | AC      | WT            |         | WT          |
| 41 | f   | 55  | trunk        | AC      | WT            |         | WT          |
| 42 | f   | 55  | trunk        | AD      | WT            |         | WT          |
| 43 | f   | 55  | trunk        | AC      | WT            |         | WT          |
| 44 | f   | 50  | trunk        | AC      | WT            |         | WT          |
| 45 | f   | 50  | trunk        | AC      | WT            |         | WT          |
| 46 | f   | 50  | neck         | AC      | WT            |         | WT          |
| 47 | f   | 50  | neck         | AC      | WT            |         | WT          |
| 48 | f   | 68  | trunk        | AC      | WT            |         | WT          |

|    |   |    |       |    |              |       |
|----|---|----|-------|----|--------------|-------|
| 49 | f | 68 | trunk | AC | WT           | WT    |
| 50 | f | 68 | trunk | HY | WT           | WT    |
| 51 | f | 68 | neck  | AC | WT           | WT    |
| 52 | f | 68 | trunk | HY | WT           | WT    |
| 53 | f | 68 | neck  | HY | WT           | WT    |
| 54 | f | 62 | trunk | AD | <b>E542K</b> | K652E |
| 55 | f | 68 | head  | AD | WT           | R248C |
| 56 | f | 52 | trunk | AC | WT           | K652M |
| 57 | f | 67 | trunk | AC | <b>E542K</b> | WT    |
| 58 | f | 59 | trunk | AC | WT           | WT    |
| 59 | m | 45 | trunk | AC | WT           | WT    |
| 60 | f | 59 | trunk | AC | WT           | WT    |
| 61 | m | 62 | head  | AC | WT           | R248C |
| 62 | f | 71 | head  | AC | <b>E542K</b> | R248C |

---
